# Supplementary material
Source: PubMed Central journal article supplement (PMC8562569)
Supplement: NIHMS1716880-supplement-Supplementary_Tables_1_and_2.pdf [file NIHMS1716880-supplement-Supplementary_Tables_1_and_2.pdf]

**Supplementary Table 1. Tyrosine Kinase Inhibitor Screening Data**

| Category          | Parameter                                | Description                                                                                                                |
|-------------------|------------------------------------------|----------------------------------------------------------------------------------------------------------------------------|
| Assay             | Type of assay                            | Cell-based                                                                                                                 |
|                   | Target                                   | Tyrosine kinase inhibitor library purchased from Selleckchem (version of 2016), ESK981 was provided by Esanik Therapeutics |
|                   | Primary measurement                      | Detection of cell viability                                                                                                |
|                   | Key reagents                             | Cell culture media, DMSO, formaldehyde, crystal violet                                                                     |
|                   | Assay protocol                           | Detailed methods are provided in the Methods section of this study                                                         |
|                   | Additional comments                      |                                                                                                                            |
| Library           | Library size                             | 168 compounds                                                                                                              |
|                   | Library composition                      | A collection of tyrosine kinase inhibitors with known targets                                                              |
|                   | Source                                   | Selleckchem (version of 2016), ESK981 was provided by Esanik Therapeutics                                                  |
|                   | Additional comments                      |                                                                                                                            |
| Screen            | Format                                   | 96 well                                                                                                                    |
|                   | Concentration(s) tested                  | 300 nM compound, 0.1% DMSO                                                                                                 |
|                   | Plate controls                           | DMSO at a final concentration of 0.1%                                                                                      |
|                   | Reagent/ compound dispensing system      | Manual                                                                                                                     |
|                   | Detection instrument and software        | Tecan M1000 plate reader                                                                                                   |
|                   | Assay validation/QC                      | Top targets were consistent with previous publications                                                                     |
|                   | Correction factors                       | Not applicable                                                                                                             |
|                   | Normalization                            | Normalized to DMSO control                                                                                                 |
|                   | Additional comments                      |                                                                                                                            |
| Post-HTS analysis | Hit criteria                             | Cell viability less than DMSO control                                                                                      |
|                   | Hit rate                                 | 34 out of 168 (20%) compounds showed proliferation inhibitory effect when compared with DMSO control                       |
|                   | Additional assay(s)                      | Follow up viability assay was performed for targets of interest                                                            |
|                   | Confirmation of hit purity and structure | Purity of compounds were ensured by NMR and HPLC                                                                           |
|                   | Additional comments                      |                                                                                                                            |

**Supplementary Table 2. SYBR green qPCR primer sequences**

| Gene Name      | Forward                  | Reverse                  |
|----------------|--------------------------|--------------------------|
| <i>GAPDH</i>   | TGCACCACCAACTGCTTAGC     | GGCATGGACTGTGGTCATGAG    |
| <i>CXCL10</i>  | GGTGAGAAGAGATGTCTGAATCC  | GTCCATCCTTGAAGCACTGCA    |
| <i>CXCL9</i>   | CTGTTCTGCATCAGCACCAAC    | TGAACTCCATTCTTCAGTGTAGCA |
| <i>PIKFYVE</i> | CTGAGTGATGCTGTGTGGTCAAC  | CAAGGACTGACACAGGCACTAG   |
| <i>PIP5K1C</i> | ACTACAGCCTCCATTGCCACGA   | CATCCTGTCCAGACGACTGTGT   |
| <i>PIK3CA</i>  | GAAGCACCTGAATAGGCAAGTCG  | GAGCATCCATGAAATCTGGTCGC  |
| <i>Gapdh</i>   | CATCACTGCCACCCAGAAGACTG  | ATGCCAGTGAGCTTCCCCTTCAG  |
| <i>Cxcl10</i>  | ATCATCCCTGCGAGCCTATCCT   | GACCTTTTTTGGCTAAACGCTTTC |
| <i>Cxcl9</i>   | CCTAGTGATAAGGAATGCACGATG | CTAGGCAGGTTTGATCTCCGTTTC |
| <i>Cd3e</i>    | GCTCCAGGATTTCTCGGAAGTC   | ATGGCTACTGCTGTCAGGTCCA   |
