# Supplementary material
Source: PubMed Central journal article supplement (PMC8562569)

### Extended Data Figure 4b

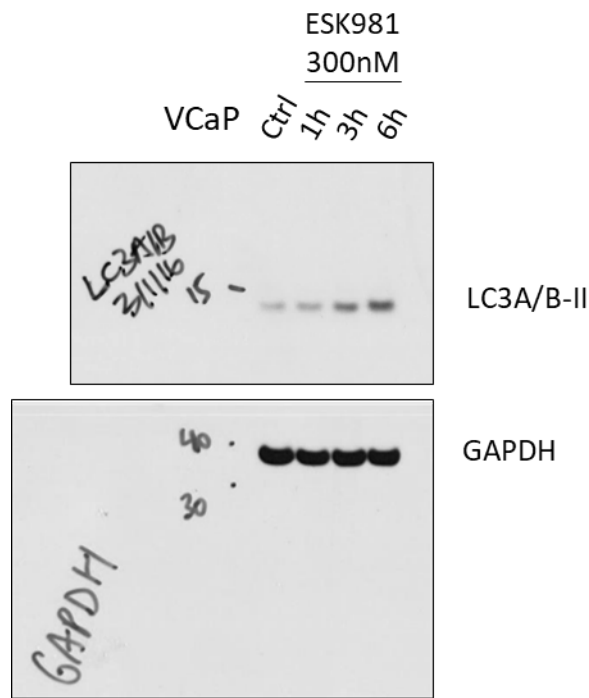

### Extended Data Figure 4c

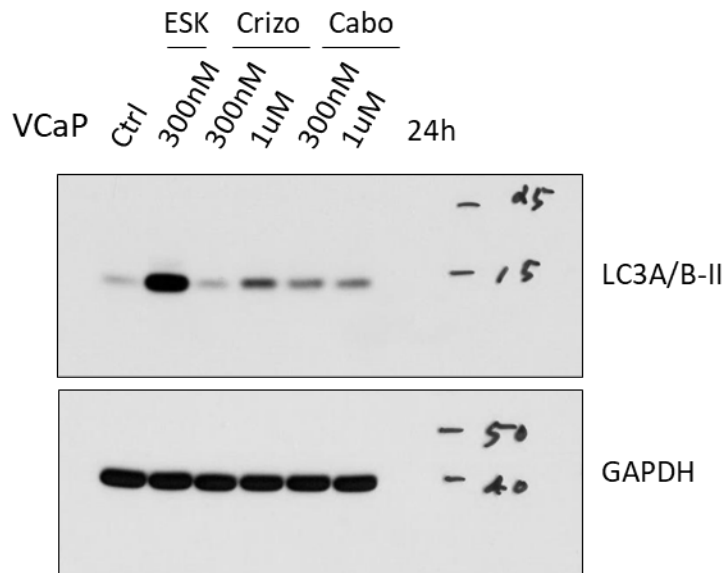

# Extended Data Figure 4d

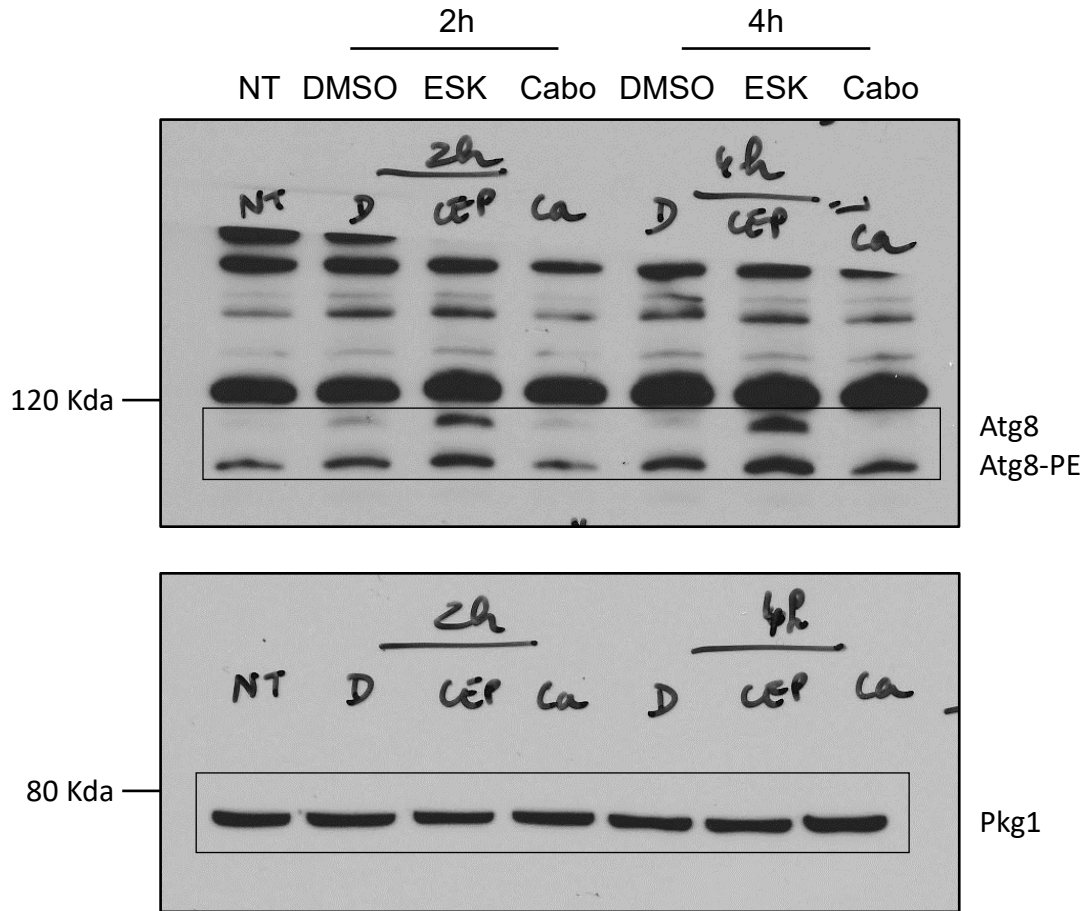

# Extended Data Figure 4e (left)

## VCaP

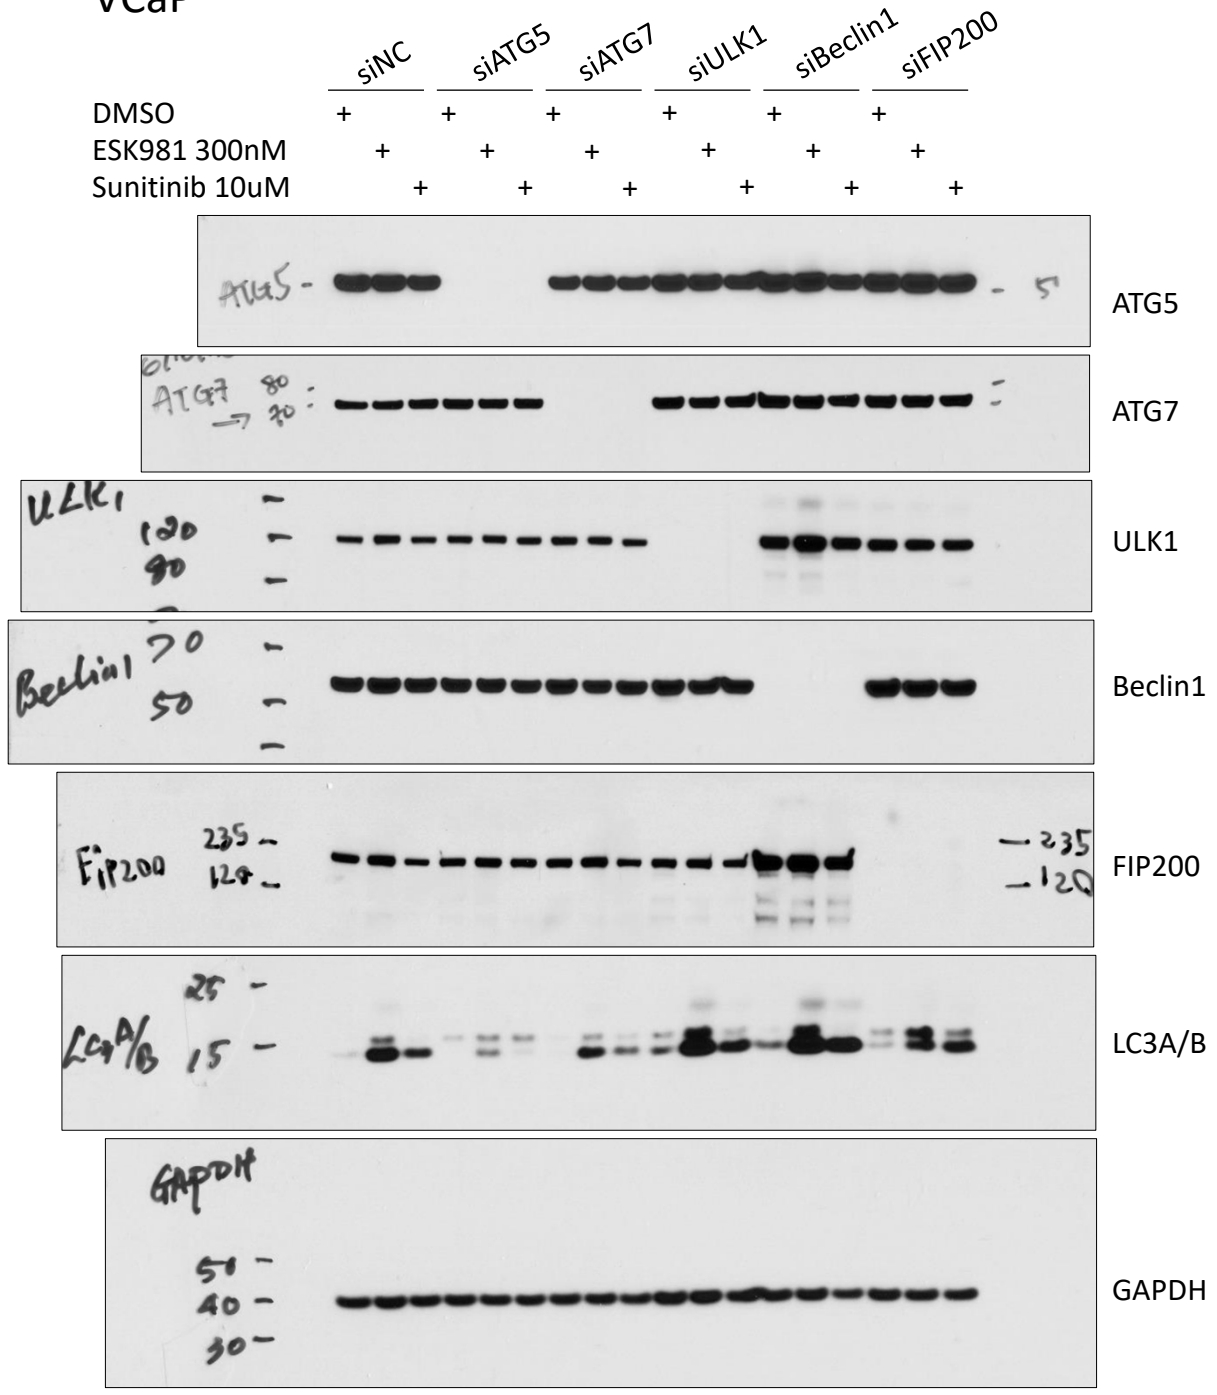

# Extended Data Figure 4e (right)

## LNCaP

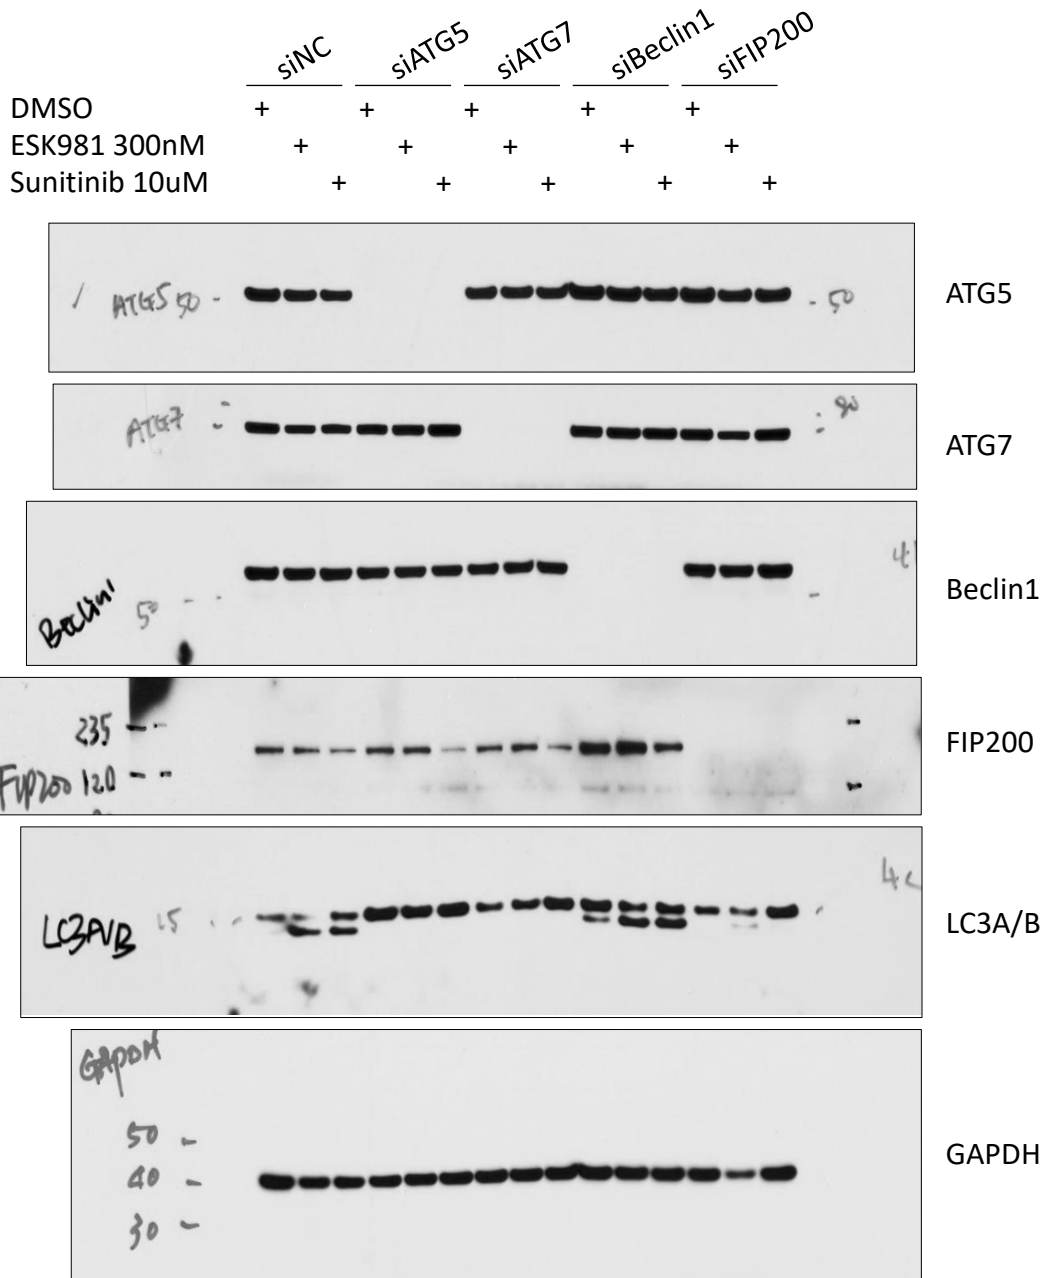

Supplement: NIHMS1716880-supplement-Unprocessed_Blots_for_Extended_Data_Figure_4.pdf [file NIHMS1716880-supplement-Unprocessed_Blots_for_Extended_Data_Figure_4.pdf]
