# Supplementary material
Source: PubMed Central journal article supplement (PMC8562569)

Supplementary Fig.1: Flow Cytometry Gating Strategy

Gating for T cells

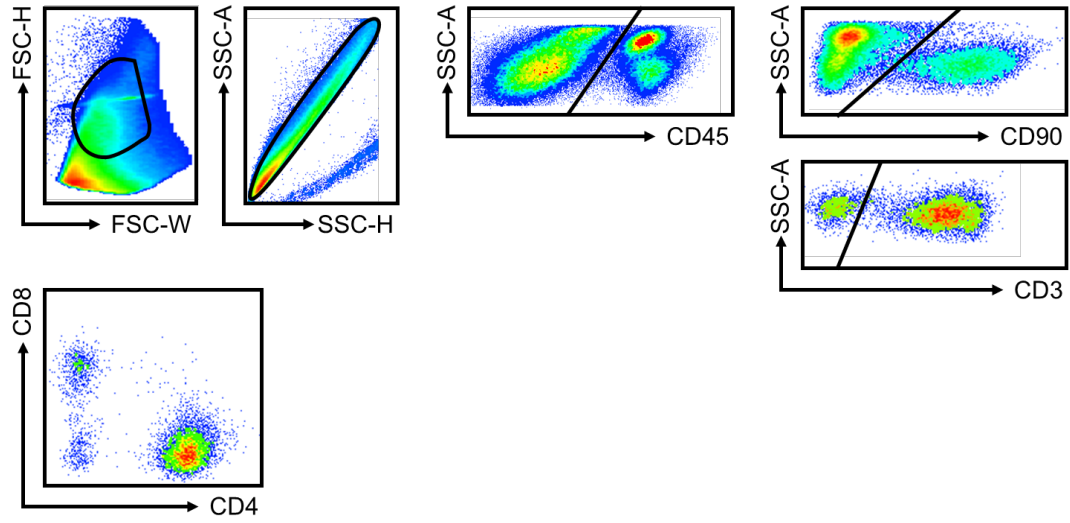

Gating for tumor cells

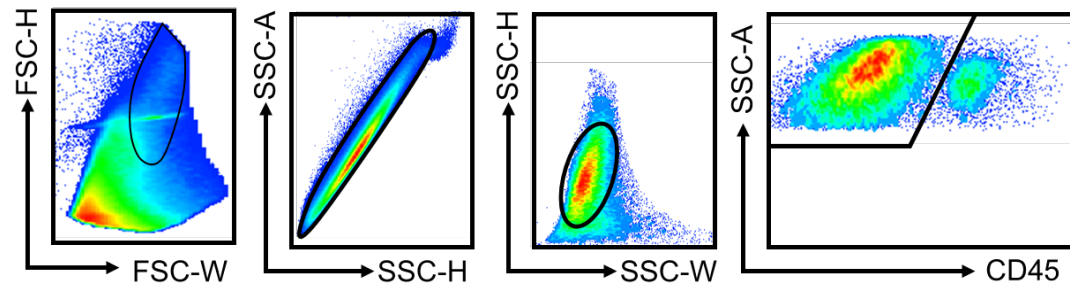

Supplement: NIHMS1716880-supplement-Supplementary_Figure_1.pdf [file NIHMS1716880-supplement-Supplementary_Figure_1.pdf]

# Extended Data Figure 5d

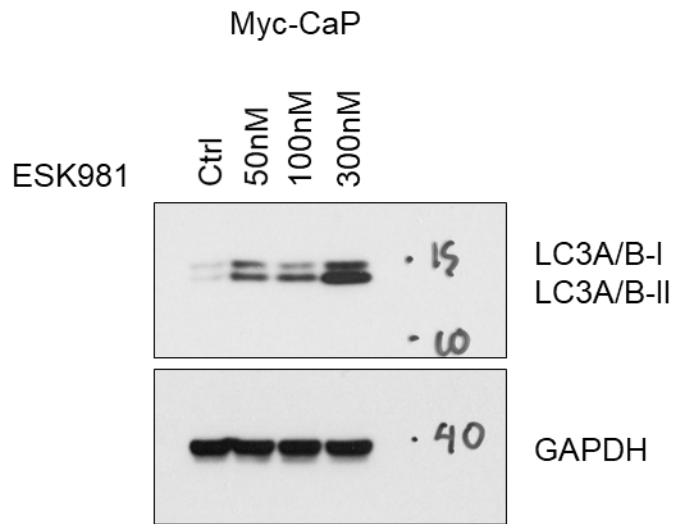

Supplement: NIHMS1716880-supplement-Unprocessed_Blots_for_Extended_Data_Figure_5.pdf [file NIHMS1716880-supplement-Unprocessed_Blots_for_Extended_Data_Figure_5.pdf]

# Extended Data Figure 6a

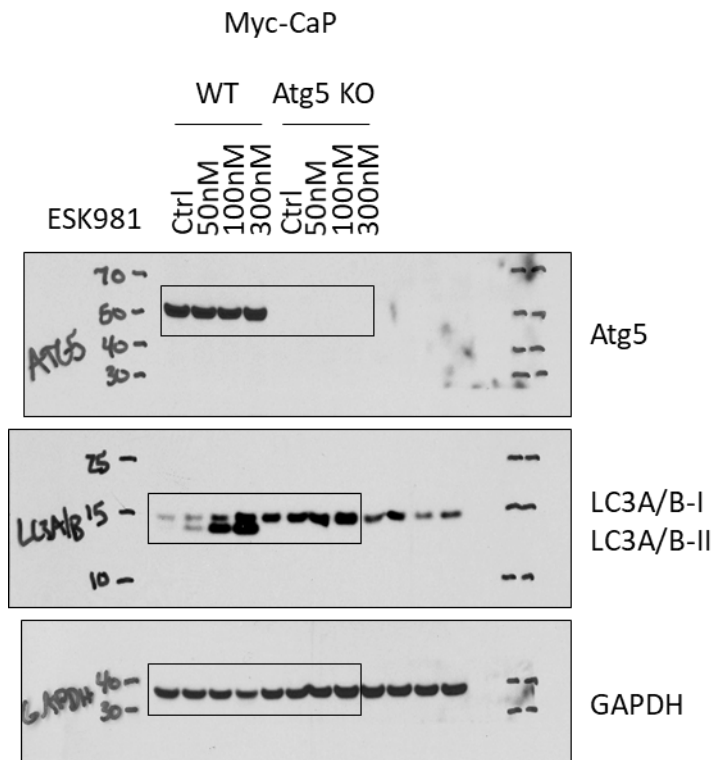

Extended Data Figure 6d

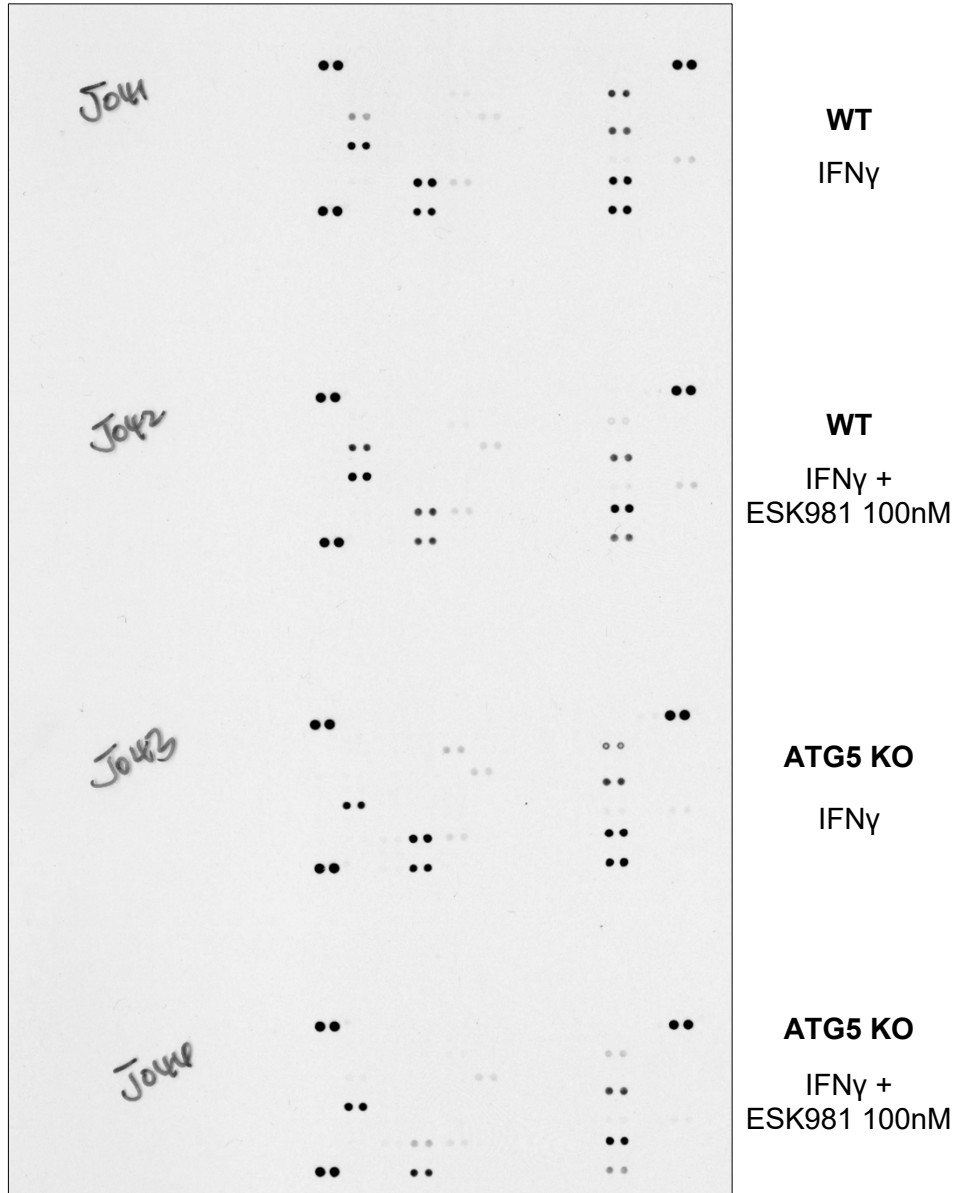

Supplement: NIHMS1716880-supplement-Unprocessed_Blots_for_Extended_Data_Figure_6.pdf [file NIHMS1716880-supplement-Unprocessed_Blots_for_Extended_Data_Figure_6.pdf]

Figure 3d

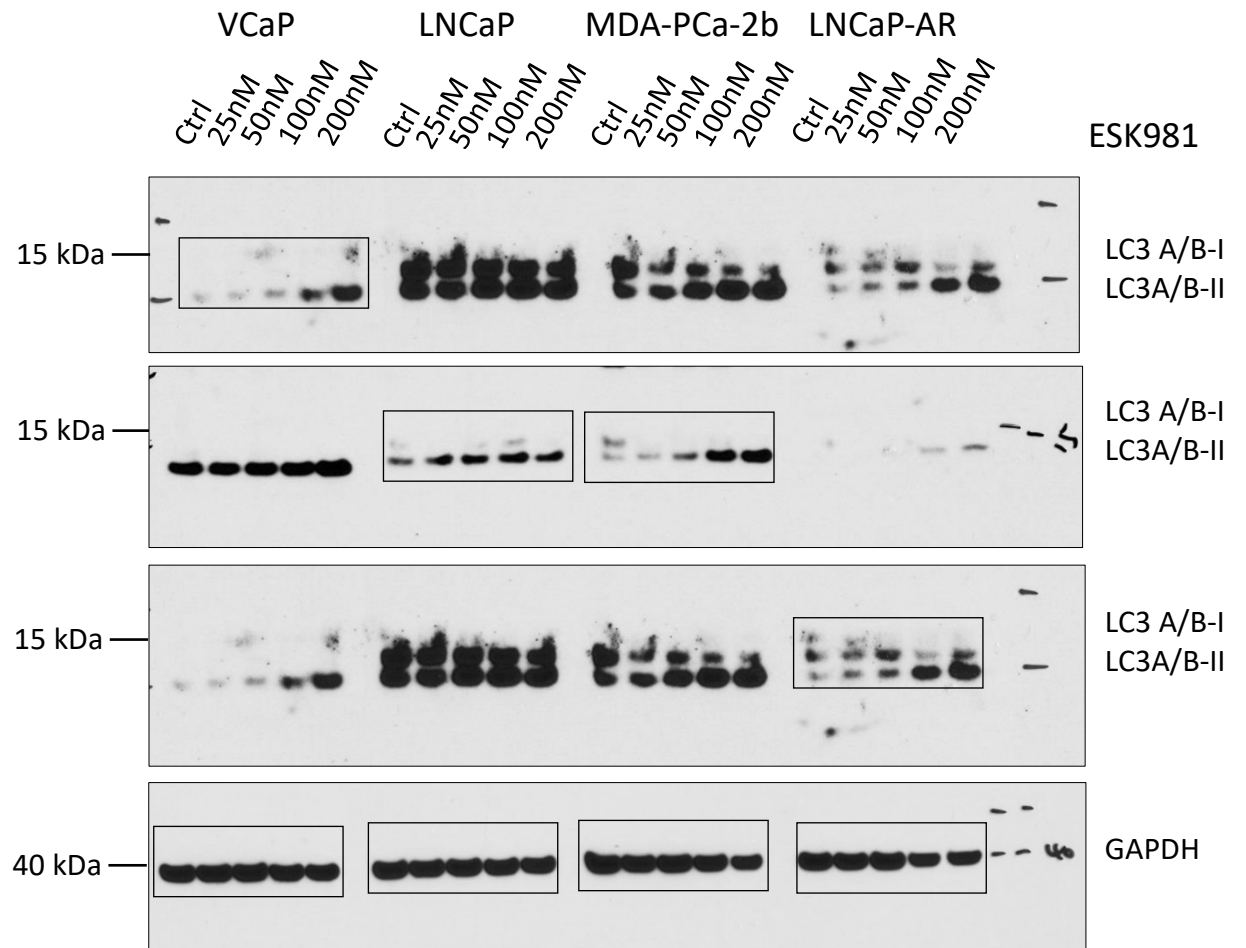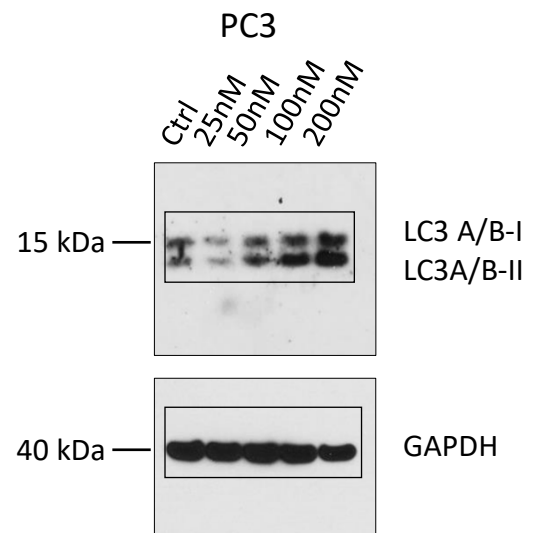

Supplement: NIHMS1716880-supplement-Unprocessed_Blots_for_Figure_3.pdf [file NIHMS1716880-supplement-Unprocessed_Blots_for_Figure_3.pdf]

Figure 4f (right)

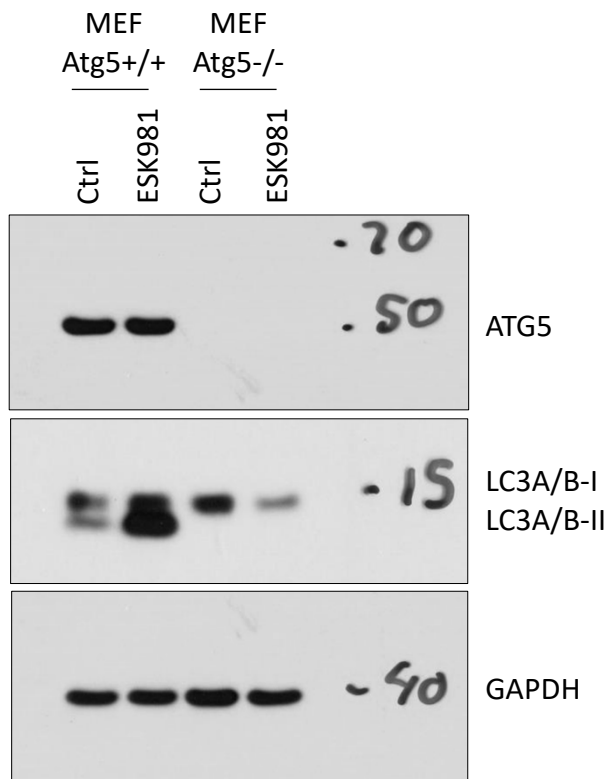

Supplement: NIHMS1716880-supplement-Unprocessed_Blots_for_Figure_4.pdf [file NIHMS1716880-supplement-Unprocessed_Blots_for_Figure_4.pdf]

Figure 5a

human cytokine array

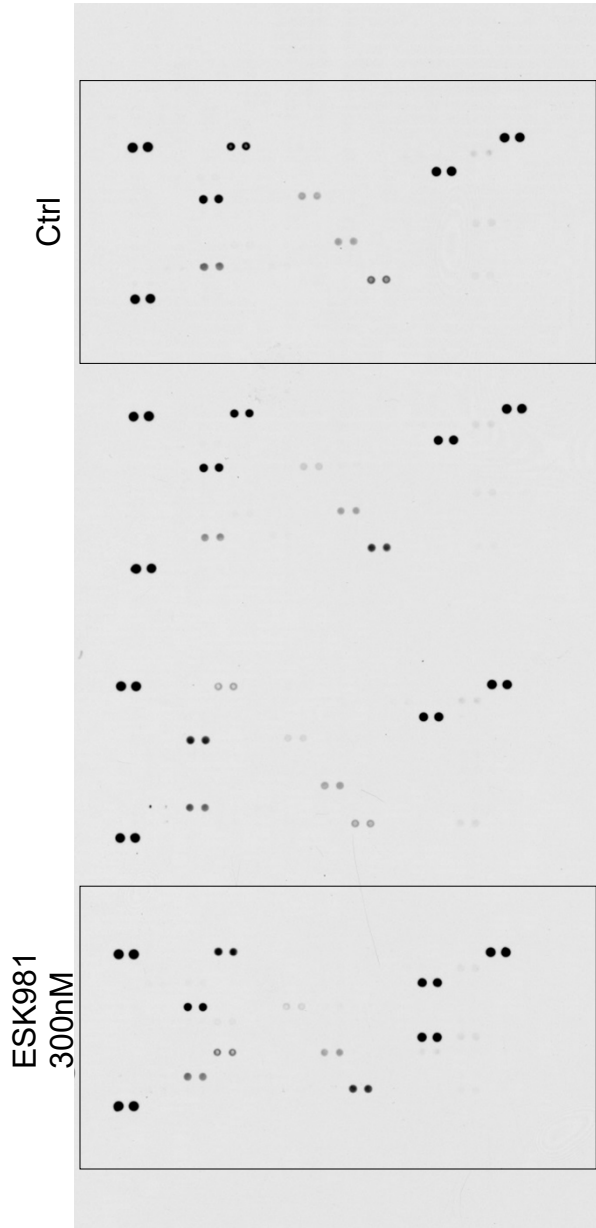

Supplement: NIHMS1716880-supplement-Unprocessed_Blots_for_Figure_5.pdf [file NIHMS1716880-supplement-Unprocessed_Blots_for_Figure_5.pdf]

Figure 6d

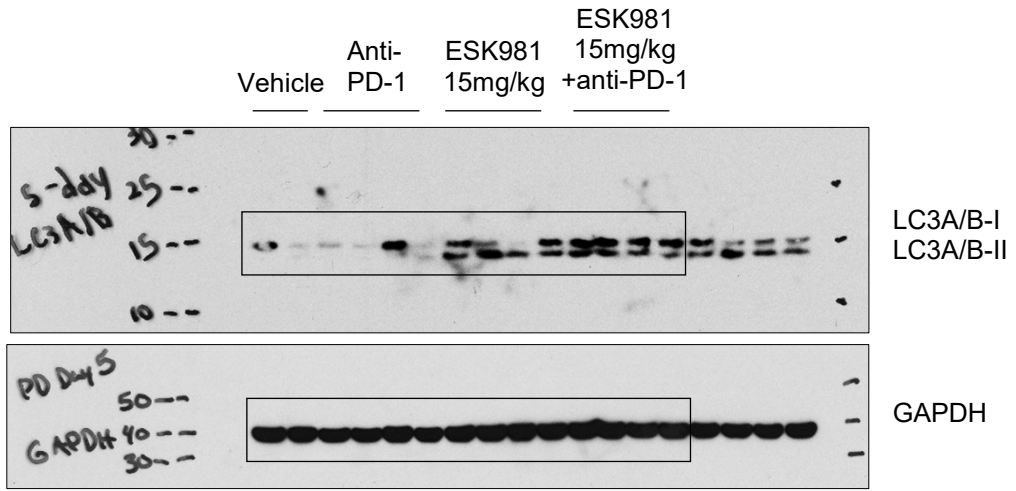

Supplement: NIHMS1716880-supplement-Unprocessed_Blots_for_Figure_6.pdf [file NIHMS1716880-supplement-Unprocessed_Blots_for_Figure_6.pdf]

Figure 7h

VCaP

2hr Tx                      Ctrl                      ESK981 1 $\mu$ M                      Apilimod 1 $\mu$ M  
46 48 49 50 51 52      46 48 49 50 51 52      46 48 49 50 51 52

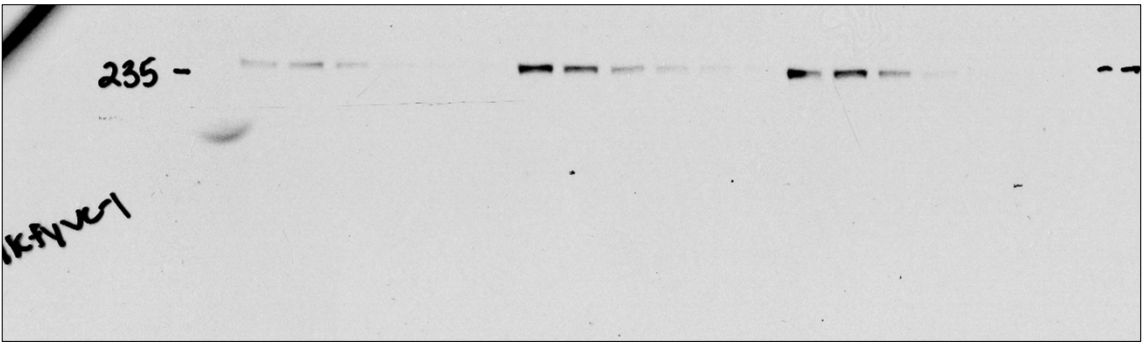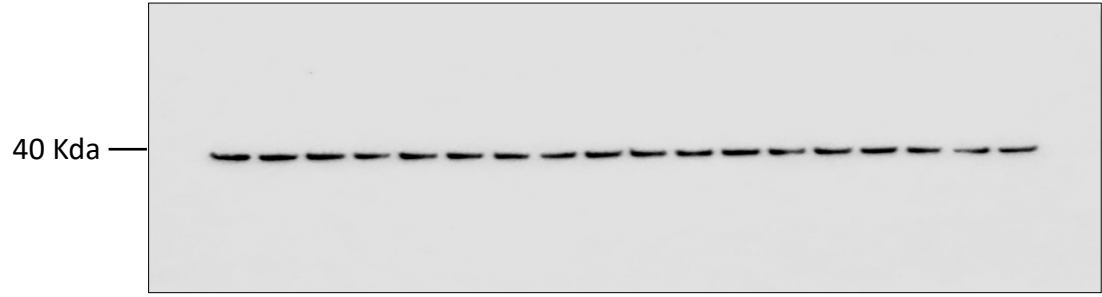

Supplement: NIHMS1716880-supplement-Unprocessed_Blots_for_Figure_7.pdf [file NIHMS1716880-supplement-Unprocessed_Blots_for_Figure_7.pdf]
